# Supplementary material
Source: MDPI journal article supplement (https://www.mdpi.com/2071-1050/13/20/11336)
Supplement: s1 [file s1 › sustainability-1404355-supplementary.pdf]

## Supplementary Materials

# The Fallow Period Plays an Important Role in Annual CH<sub>4</sub> Emission in a Rice Paddy in Southern Brazil

Cristiano Maboni <sup>1,\*</sup>, Tiago Bremm <sup>1</sup>, Leonardo José Gonçalves Aguiar <sup>2</sup>, Walkyria Bueno Scivittaro <sup>3</sup>, Vanessa de Arruda Souza <sup>1,\*</sup>, Hans Rogério Zimmermann <sup>1</sup>, Claudio Alberto Teichrieb <sup>1</sup>, Pablo Eli Soares de Oliveira <sup>1</sup>, Dirceu Luis Herdies <sup>4</sup>, Gervásio Annes Degrazia <sup>1</sup> and Débora Regina Roberti <sup>1,\*</sup>

- <sup>1</sup> Departamento de Física, Universidade Federal de Santa Maria (UFSM), Santa Maria 97105900, Brazil; bremm.tiago@gmail.com (T.B.); zr hans@gmail.com (H.R.Z.); teichrieb@gmail.com (C.Z.T.); pablo.deoliveira@gmail.com (P.E.S.d.O.); gervasio.degrazia@gmail.com (G.A.D.)
  - <sup>2</sup> Faculdade de Meteorologia, Universidade Federal de Pelotas (UFPel), Pelotas 96010610, Brazil; veraneiro@yahoo.com.br (L.J.G.A.)
  - <sup>3</sup> Embrapa Clima Temperado, Pelotas 96010971, Brazil; walkyria.scivittaro@embrapa.br (W.B.S.)
  - <sup>4</sup> Centro de Previsão de Tempo e Estudos Climáticos (CPTEC), Instituto Nacional de Pesquisas Espaciais (INPE), Cachoeira Paulista, São Paulo 12200000, Brazil; dirceu.herdies@inpe.br (D.L.H.)
- \* Correspondence: cristianomaboni@hotmail.com (C.M.); v.arruda.s@gmail.com (V.d.A.S.); debora@ufsm.br (D.R.R.); Tel.: +55 55 32208137

**Citation:** Maboni, C.; Bremm, T.; Aguiar, L.J.G.; Scivittaro, W.B.; de Arruda Souza, V.; Zimmermann, H.R.; Teichrieb, C.A.; de Oliveira, P.E.S.; Herdies, D.L.; Degrazia, G.A.; et al. The Fallow Period Plays an Important Role in Annual CH<sub>4</sub> Emission in a Rice Paddy in Southern Brazil. *Sustainability* **2021**, *13*, 11336. <https://doi.org/10.3390/su132011336>

Academic Editor: Azad Haider

Received: 16 September 2021

Accepted: 10 October 2021

Published: 14 October 2021

**Publisher's Note:** MDPI stays neutral with regard to jurisdictional claims in published maps and institutional affiliations.

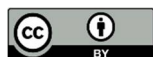

**Copyright:** © 2021 by the authors. Licensee MDPI, Basel, Switzerland. This article is an open access article distributed under the terms and conditions of the Creative Commons Attribution (CC BY) license (<http://creativecommons.org/licenses/by/4.0/>).

### Technical problems measuring CH<sub>4</sub> fluxes using EC

We started the measurements with the gas analyzer in the flux tower in the rice paddy in 2014. At that time, the data collected by the sonic anemometer was being stored in the CR1000 datalogger and the CH<sub>4</sub> concentration data in the LI-7500 interface that generated a time synchronization problem, making it impossible to estimate the CH<sub>4</sub> fluxes. Numerous unsuccessful attempts were made to solve the time desynchronization. The data were also sent to the technical team of the sensor company, but the diagnosis was that the flux calculation would not be possible due to this desynchronization (Liang Xu, 2016, personal communication). Another problem was the signal from gas analyzer LI-7700, as its lens got dirty over time. The sensor lens was cleaned according to the manufacturer's recommendation; however, this procedure was not enough to increase the signal above 10%. The dirt embedded in the lens must have been due to the aircraft pesticide spraying. The solution was to clean with creamy soap, popularly sold in Brazil for domestic cleaning. Thus, the sensor signal returned to values of around 90%. Therefore, we were only able to obtain quality data to estimate the CH<sub>4</sub> flux by EC in December 2015. Unfortunately, the sonic anemometer sensor presented a technical problem at the end of August 2016 and no CH<sub>4</sub> fluxes could be obtained. In November 2016, our financial project to measure surface fluxes with eddy covariance in rice paddy finished.
